# Supplementary material for: Changing Metabolic Patterns along the Colorectal Adenoma–Carcinoma Sequence
Source: MDPI journal article supplement (doi:10.3390/jcm11030721), 2022-01-29
Supplement: s1 [file s1]

# Supplementary Materials: Changing metabolic Patterns along the Colorectal Adenoma-Carcinoma Sequence

Julia Tevini, Sebastian K. Eder, Ursula Huber-Schönauer, David Niederseer, Georg Streibinger, Johanna M. Gostner, Elmar Aigner, Christian Datz and Thomas K. Felder

**Table S1.** List of metabolites of the metabolomics analysis of the training cohort.

| (μM)                  | Training cohort (n=82) |                 |                 | Post hoc P-value |                  |            |
|-----------------------|------------------------|-----------------|-----------------|------------------|------------------|------------|
|                       | Ctrl                   | AA              | CRC             |                  |                  |            |
|                       | (n=36)                 | (n=28)          | (n=18)          | Ctrl vs. AA      | Ctrl vs. CRC     | AA vs. CRC |
| <b>Acylcarnitines</b> |                        |                 |                 |                  |                  |            |
| C0                    | 39 ± 7                 | 38 ± 7          | 36 ± 8          | 0.875            | 0.970            | 0.999      |
| C2                    | 6.49 ± 1.99            | 9.16 ± 3.50     | 8.86 ± 2.65     | <b>&lt;0.001</b> | <b>0.001</b>     | 0.982      |
| C3                    | 0.34 ± 0.11            | 0.35 ± 0.09     | 0.33 ± 0.19     | 0.350            | 0.267            | 0.062      |
| C4                    | 0.19 ± 0.08            | 0.21 ± 0.09     | 0.18 ± 0.06     | 0.256            | 0.646            | 0.322      |
| C5                    | 0.12 ± 0.06            | 0.13 ± 0.05     | 0.12 ± 0.07     | 0.797            | 0.985            | 0.770      |
| C6 (C4:1-DC)          | 0.02 ± 0.03            | 0.05 ± 0.05     | 0.05 ± 0.05     | <b>0.003</b>     | <b>0.004</b>     | 0.749      |
| C7-DC                 | 0.022 ± 0.022          | 0.031 ± 0.022   | 0.038 ± 0.020   | 0.158            | <b>0.025</b>     | 0.262      |
| C8                    | 0.13 ± 0.11            | 0.20 ± 0.12     | 0.21 ± 0.07     | <b>0.006</b>     | <b>0.004</b>     | 0.628      |
| C9                    | 0.04 ± 0.02            | 0.03 ± 0.03     | 0.03 ± 0.02     | 0.340            | 0.549            | 0.734      |
| C10                   | 0.23 ± 0.11            | 0.30 ± 0.12     | 0.32 ± 0.11     | <b>0.004</b>     | <b>0.003</b>     | 0.521      |
| C10:1                 | 0.07 ± 0.08            | 0.14 ± 0.07     | 0.13 ± 0.07     | <b>0.002</b>     | <b>0.008</b>     | 0.839      |
| C10:2                 | 0.01 ± 0.02            | 0.01 ± 0.02     | 0.01 ± 0.02     | 0.136            | 0.892            | 0.218      |
| C12                   | 0.05 ± 0.07            | 0.10 ± 0.07     | 0.13 ± 0.08     | <b>0.019</b>     | <b>0.002</b>     | 0.184      |
| C12:1                 | 0.04 ± 0.05            | 0.08 ± 0.06     | 0.11 ± 0.07     | <b>0.004</b>     | <b>0.001</b>     | 0.215      |
| C14                   | 0.03 ± 0.01            | 0.04 ± 0.01     | 0.04 ± 0.01     | <b>0.031</b>     | <b>0.032</b>     | 0.693      |
| C14:1                 | 0.06 ± 0.02            | 0.09 ± 0.02     | 0.10 ± 0.04     | <b>0.002</b>     | <b>0.007</b>     | 0.920      |
| C14:1-OH              | 0.003 ± 0.007          | 0.0051 ± 0.0082 | 0.0056 ± 0.0095 | 0.269            | 0.262            | 0.821      |
| C14:2                 | 0.02 ± 0.01            | 0.03 ± 0.01     | 0.03 ± 0.01     | <b>0.033</b>     | 0.088            | 0.990      |
| C16                   | 0.11 ± 0.02            | 0.11 ± 0.03     | 0.12 ± 0.03     | 0.482            | 0.137            | 0.651      |
| C16:1                 | <LOQ                   | 0.003 ± 0.014   | 0.0131 ± 0.0304 | 0.257            | <b>0.013</b>     | 0.117      |
| C16:1-OH              | 0.001 ± 0.004          | 0.0035 ± 0.0061 | 0.0026 ± 0.0059 | 0.074            | 0.305            | 0.651      |
| C16:2                 | 0.0003 ± 0.002         | 0.0025 ± 0.0054 | 0.0053 ± 0.0080 | <b>0.036</b>     | <b>0.001</b>     | 0.190      |
| C18                   | 0.06 ± 0.01            | 0.056 ± 0.01    | 0.06 ± 0.02     | 0.776            | 0.295            | 0.260      |
| C18:1                 | 0.11 ± 0.03            | 0.13 ± 0.03     | 0.16 ± 0.04     | <b>0.017</b>     | <b>&lt;0.001</b> | 0.110      |
| C18:2                 | 0.05 ± 0.01            | 0.05 ± 0.01     | 0.06 ± 0.02     | 0.171            | 0.054            | 0.521      |
| <b>Amino acids</b>    |                        |                 |                 |                  |                  |            |
| Ala                   | 381 ± 68               | 379 ± 65        | 367 ± 55        | 0.901            | 0.487            | 0.790      |
| Arg                   | 112 ± 24               | 111 ± 21        | 126 ± 25        | 0.967            | 0.056            | 0.114      |
| Asn                   | 53 ± 7                 | 51 ± 8          | 51 ± 10         | 0.403            | 0.288            | 0.920      |
| Asp                   | 42 ± 10                | 42 ± 10         | 46 ± 18         | 0.825            | 0.875            | 0.690      |
| Cit                   | 37 ± 8                 | 37 ± 8          | 35 ± 12         | 0.951            | 0.790            | 0.556      |
| Gln                   | 640 ± 93               | 606 ± 73        | 608 ± 156       | 0.180            | 0.125            | 0.451      |
| Glu                   | 71 ± 19                | 85 ± 29         | 83 ± 35         | 0.177            | 0.541            | 1.000      |

|                             |              |              |              |              |                  |              |
|-----------------------------|--------------|--------------|--------------|--------------|------------------|--------------|
| Gly                         | 335 ± 86     | 293 ± 64     | 295 ± 64     | <b>0.036</b> | 0.132            | 0.710        |
| His                         | 85 ± 9       | 81 ± 11      | 77 ± 21      | 0.288        | <b>0.004</b>     | 0.083        |
| Ile                         | 74 ± 13      | 84 ± 25      | 84 ± 25      | 0.120        | 0.158            | 0.946        |
| Leu                         | 164 ± 27     | 175 ± 39     | 169 ± 48     | 0.440        | 0.912            | 0.536        |
| Lys                         | 244 ± 39     | 244 ± 40     | 232 ± 54     | 0.978        | 0.166            | 0.137        |
| Met                         | 24 ± 4       | 23 ± 4       | 25 ± 5       | 0.735        | 0.441            | 0.356        |
| Orn                         | 86 ± 22      | 94 ± 17      | 81 ± 24      | <b>0.045</b> | 0.987            | 0.320        |
| Phe                         | 69 ± 10      | 72 ± 9       | 74 ± 18      | 0.120        | 0.971            | 0.411        |
| Pro                         | 178 ± 54     | 167 ± 42     | 160 ± 49     | 0.436        | 0.248            | 0.581        |
| Ser                         | 156 ± 36     | 143 ± 22     | 159 ± 39     | 0.234        | 0.854            | 0.173        |
| Thr                         | 123 ± 26     | 127 ± 22     | 111 ± 36     | 0.503        | 0.079            | 0.050        |
| Trp                         | 67 ± 11      | 67 ± 14      | 62 ± 16      | 0.994        | 1.000            | 0.996        |
| Tyr                         | 65 ± 13      | 69 ± 11      | 68 ± 19      | 0.412        | 0.743            | 0.983        |
| Val                         | 225 ± 36     | 232 ± 44     | 223 ± 47     | 0.715        | 0.388            | 0.405        |
| <b>Biogenic amines</b>      |              |              |              |              |                  |              |
| AcOrn                       | 1.38 ± 0.72  | 1.09 ± 0.56  | 1.03 ± 0.66  | 0.120        | 0.088            | 0.581        |
| ADMA                        | 0.53 ± 0.11  | 0.58 ± 0.10  | 0.58 ± 0.11  | 0.348        | 0.159            | 0.801        |
| Alpha AAA                   | 1.15 ± 0.30  | 1.37 ± 0.63  | 1.20 ± 0.36  | 0.398        | 0.551            | 0.702        |
| Creatinine                  | 83 ± 17      | 86 ± 22      | 95 ± 27      | 0.617        | 0.108            | 0.290        |
| Histamine                   | 0.35 ± 0.003 | 0.35 ± 0.006 | 0.35 ± 0.003 | 0.322        | 0.080            | 0.406        |
| Kynurenine                  | 2.78 ± 0.58  | 2.95 ± 0.89  | 3.62 ± 2.21  | 0.607        | 0.393            | 0.677        |
| MetSO                       | 0.61 ± 0.23  | 0.69 ± 0.21  | 0.78 ± 0.51  | 0.064        | 0.202            | 0.884        |
| Putrescine                  | 0.12 ± 0.05  | 0.13 ± 0.08  | 0.11 ± 0.05  | 0.860        | 0.811            | 0.628        |
| Serotonin                   | 0.63 ± 0.31  | 0.65 ± 0.36  | 0.72 ± 0.40  | 0.730        | 0.287            | 0.574        |
| Spermidine                  | 0.23 ± 0.05  | 0.24 ± 0.07  | 0.23 ± 0.04  | 0.771        | 0.941            | 0.796        |
| Spermine                    | 0.21 ± 0.02  | 0.21 ± 0.02  | 0.21 ± 0.02  | 0.326        | 0.693            | 0.839        |
| Taurine                     | 132 ± 43     | 123 ± 33     | 110 ± 37     | 0.461        | 0.095            | 0.246        |
| Total DMA                   | 0.83 ± 0.12  | 0.89 ± 0.15  | 1.01 ± 0.16  | 0.307        | <b>&lt;0.001</b> | <b>0.007</b> |
| t4-OH-Pro                   | 11.26 ± 5.83 | 11.84 ± 6.06 | 9.58 ± 3.59  | 0.590        | 0.505            | 0.246        |
| <b>Glycerophospholipids</b> |              |              |              |              |                  |              |
| LysoPC a C16:0              | 128 ± 22     | 112 ± 22     | 97 ± 25      | <b>0.032</b> | <b>0.027</b>     | 0.845        |
| LysoPC a C16:1              | 3.57 ± 0.80  | 3.30 ± 1.01  | 2.46 ± 1.10  | 0.463        | <b>0.027</b>     | 0.253        |
| LysoPC a C17:0              | 2.35 ± 0.48  | 1.85 ± 0.56  | 1.63 ± 0.60  | <b>0.001</b> | <b>0.007</b>     | 0.980        |
| LysoPC a C18:0              | 31 ± 6       | 26 ± 6       | 23 ± 8       | <b>0.012</b> | <b>0.024</b>     | 0.939        |
| LysoPC a C18:1              | 25 ± 5       | 21 ± 5       | 18 ± 6       | <b>0.034</b> | <b>0.033</b>     | 0.876        |
| LysoPC a C18:2              | 32 ± 9       | 27 ± 9       | 21 ± 9       | <b>0.041</b> | <b>0.001</b>     | 0.167        |
| LysoPC a C20:3              | 2.40 ± 0.61  | 2.06 ± 0.64  | 1.57 ± 0.56  | 0.129        | <b>0.019</b>     | 0.476        |
| LysoPC a C20:4              | 7.85 ± 2.08  | 6.92 ± 2.04  | 6.08 ± 2.38  | 0.187        | 0.790            | 0.925        |
| LysoPC a C24:0              | 0.19 ± 0.04  | 0.19 ± 0.04  | 0.17 ± 0.04  | 0.974        | 0.181            | 0.305        |
| LysoPC a C26:0              | 0.27 ± 0.09  | 0.25 ± 0.09  | 0.22 ± 0.06  | 0.444        | <b>0.039</b>     | 0.150        |
| LysoPC a C26:1              | 0.13 ± 0.03  | 0.13 ± 0.03  | 0.11 ± 0.02  | 0.999        | 0.634            | 0.565        |
| LysoPC a C28:0              | 0.37 ± 0.07  | 0.32 ± 0.10  | 0.27 ± 0.12  | <b>0.019</b> | <b>0.001</b>     | 0.173        |
| LysoPC a C28:1              | 0.49 ± 0.10  | 0.43 ± 0.13  | 0.34 ± 0.10  | 0.233        | <b>0.003</b>     | 0.090        |
| PC aa C24:0                 | 0.07 ± 0.03  | 0.07 ± 0.03  | 0.06 ± 0.02  | 0.631        | 0.142            | 0.478        |
| PC aa C28:1                 | 2.63 ± 0.55  | 2.47 ± 0.62  | 2.09 ± 0.55  | 0.659        | <b>0.006</b>     | 0.088        |
| PC aa C30:0                 | 3.66 ± 0.91  | 3.28 ± 1.34  | 2.54 ± 0.76  | 0.076        | <b>&lt;0.001</b> | <b>0.046</b> |

|             |               |               |               |              |                  |                  |
|-------------|---------------|---------------|---------------|--------------|------------------|------------------|
| PC aa C32:0 | 8.44 ± 1.45   | 8.68 ± 2.14   | 7.69 ± 1.53   | 0.905        | 0.396            | 0.177            |
| PC aa C32:1 | 10.15 ± 4.04  | 10.48 ± 5.27  | 6.72 ± 2.03   | 0.925        | <b>0.001</b>     | <b>0.007</b>     |
| PC aa C32:2 | 3.22 ± 0.96   | 2.60 ± 1.03   | 1.83 ± 0.76   | <b>0.031</b> | <b>&lt;0.001</b> | <b>0.028</b>     |
| PC aa C32:3 | 0.29 ± 0.07   | 0.26 ± 0.07   | 0.20 ± 0.06   | 0.229        | <b>&lt;0.001</b> | <b>0.012</b>     |
| PC aa C34:1 | 139 ± 33      | 141 ± 35      | 119 ± 20      | 0.529        | <b>0.033</b>     | <b>0.011</b>     |
| PC aa C34:2 | 230 ± 32      | 229 ± 37      | 198 ± 37      | 0.551        | <b>0.003</b>     | <b>0.024</b>     |
| PC aa C34:3 | 11.08 ± 2.55  | 10.21 ± 3.29  | 7.54 ± 2.44   | 0.099        | <b>&lt;0.001</b> | <b>0.006</b>     |
| PC aa C34:4 | 1.40 ± 0.39   | 1.21 ± 0.52   | 0.74 ± 0.31   | 0.226        | <b>&lt;0.001</b> | <b>0.002</b>     |
| PC aa C36:0 | 1.33 ± 0.32   | 1.29 ± 0.45   | 1.00 ± 0.32   | 0.375        | <b>0.003</b>     | <b>0.042</b>     |
| PC aa C36:1 | 29.81 ± 6.14  | 28.68 ± 6.74  | 23.86 ± 5.29  | 0.891        | <b>0.005</b>     | <b>0.036</b>     |
| PC aa C36:2 | 139 ± 21      | 134 ± 25      | 117 ± 26      | 0.796        | <b>0.004</b>     | <b>0.045</b>     |
| PC aa C36:3 | 87.51 ± 11.98 | 86.21 ± 16.29 | 70.58 ± 16.24 | 0.990        | <b>0.001</b>     | <b>0.002</b>     |
| PC aa C36:4 | 122 ± 22      | 128 ± 35      | 104 ± 33      | 0.842        | 0.133            | 0.075            |
| PC aa C36:5 | 17.44 ± 5.98  | 19.95 ± 13.27 | 10.14 ± 3.82  | 0.660        | <b>&lt;0.001</b> | <b>&lt;0.001</b> |
| PC aa C36:6 | 0.59 ± 0.18   | 0.56 ± 0.27   | 0.31 ± 0.14   | 0.948        | <b>&lt;0.001</b> | <b>&lt;0.001</b> |
| PC aa C38:0 | 2.20 ± 0.46   | 2.16 ± 0.64   | 1.84 ± 0.45   | 0.457        | <b>0.036</b>     | 0.224            |
| PC aa C38:1 | 1.09 ± 0.20   | 1.12 ± 0.31   | 0.92 ± 0.22   | 0.925        | <b>0.011</b>     | <b>0.011</b>     |
| PC aa C38:3 | 31 ± 6        | 32 ± 9        | 25 ± 7        | 0.849        | <b>0.043</b>     | <b>0.011</b>     |
| PC aa C38:4 | 77 ± 16       | 83 ± 26       | 69 ± 21       | 0.570        | <b>0.043</b>     | 0.056            |
| PC aa C38:5 | 36 ± 5        | 38 ± 13       | 28 ± 8        | 0.538        | <b>&lt;0.001</b> | <b>0.002</b>     |
| PC aa C38:6 | 53 ± 12       | 58 ± 20       | 44 ± 12       | 0.429        | <b>0.030</b>     | <b>0.016</b>     |
| PC aa C40:1 | 0.07 ± 0.14   | 0.06 ± 0.14   | 0.04 ± 0.11   | 0.512        | 0.357            | 0.701            |
| PC aa C40:2 | 0.23 ± 0.03   | 0.24 ± 0.07   | 0.20 ± 0.05   | 0.776        | <b>0.033</b>     | 0.120            |
| PC aa C40:3 | 0.35 ± 0.05   | 0.37 ± 0.12   | 0.30 ± 0.06   | 0.685        | <b>0.009</b>     | <b>0.016</b>     |
| PC aa C40:4 | 2.94 ± 0.50   | 2.95 ± 0.80   | 2.47 ± 0.53   | 0.998        | <b>0.016</b>     | 0.055            |
| PC aa C40:5 | 6.93 ± 1.28   | 7.33 ± 2.21   | 5.69 ± 1.10   | 0.760        | <b>0.003</b>     | <b>0.005</b>     |
| PC aa C40:6 | 18 ± 5        | 20 ± 8        | 16 ± 4        | 0.203        | 0.171            | <b>0.037</b>     |
| PC aa C42:0 | 0.44 ± 0.09   | 0.43 ± 0.08   | 0.39 ± 0.11   | 0.965        | 0.112            | 0.270            |
| PC aa C42:1 | 0.25 ± 0.05   | 0.24 ± 0.05   | 0.22 ± 0.06   | 0.803        | <b>0.030</b>     | 0.190            |
| PC aa C42:2 | 0.19 ± 0.02   | 0.19 ± 0.04   | 0.16 ± 0.04   | 1.000        | <b>0.004</b>     | <b>0.008</b>     |
| PC aa C42:4 | 0.14 ± 0.02   | 0.14 ± 0.02   | 0.113 ± 0.03  | 0.952        | 0.064            | 0.190            |
| PC aa C42:5 | 0.29 ± 0.05   | 0.33 ± 0.15   | 0.26 ± 0.06   | 0.144        | 0.069            | <b>0.013</b>     |
| PC aa C42:6 | 0.37 ± 0.06   | 0.37 ± 0.12   | 0.27 ± 0.07   | 0.547        | <b>&lt;0.001</b> | <b>0.001</b>     |
| PC ae C30:0 | 0.33 ± 0.07   | 0.27 ± 0.09   | 0.24 ± 0.08   | <b>0.024</b> | <b>0.002</b>     | 0.576            |
| PC ae C30:1 | 0.19 ± 0.07   | 0.17 ± 0.06   | 0.14 ± 0.05   | 0.746        | <b>0.038</b>     | 0.260            |
| PC ae C30:2 | 0.08 ± 0.02   | 0.08 ± 0.02   | 0.07 ± 0.02   | 0.724        | 0.106            | 0.511            |
| PC ae C32:1 | 1.85 ± 0.40   | 1.84 ± 0.44   | 1.64 ± 0.50   | 1.000        | 0.291            | 0.345            |
| PC ae C32:2 | 0.43 ± 0.10   | 0.43 ± 0.09   | 0.37 ± 0.11   | 1.000        | 0.146            | 0.146            |
| PC ae C34:0 | 1.06 ± 0.21   | 0.99 ± 0.25   | 0.87 ± 0.24   | 0.616        | <b>0.026</b>     | 0.272            |
| PC ae C34:1 | 5.93 ± 1.1    | 5.66 ± 1.11   | 5.13 ± 1.03   | 0.762        | 0.056            | 0.323            |
| PC ae C34:2 | 8.52 ± 1.73   | 7.44 ± 1.89   | 6.96 ± 2.21   | 0.071        | <b>0.016</b>     | 0.793            |
| PC ae C34:3 | 5.60 ± 1.40   | 4.99 ± 1.75   | 4.26 ± 1.63   | 0.034        | <b>0.011</b>     | 0.333            |
| PC ae C36:0 | 0.64 ± 0.11   | 0.64 ± 0.13   | 0.59 ± 0.11   | 0.997        | 0.272            | 0.393            |
| PC ae C36:1 | 4.61 ± 0.90   | 4.27 ± 0.89   | 3.68 ± 0.92   | 0.419        | <b>0.002</b>     | 0.095            |
| PC ae C36:2 | 9.40 ± 1.93   | 8.53 ± 1.69   | 7.7 ± 2.10    | 0.226        | <b>0.010</b>     | 0.399            |
| PC ae C36:3 | 5.03 ± 0.95   | 4.54 ± 1.12   | 4.20 ± 1.24   | 0.200        | <b>0.026</b>     | 0.647            |

|                        |               |               |               |                  |                  |              |
|------------------------|---------------|---------------|---------------|------------------|------------------|--------------|
| PC ae C36:4            | 13.4 ± 3.0    | 12.5 ± 3.1    | 11.3 ± 2.3    | 0.462            | <b>0.036</b>     | 0.449        |
| PC ae C36:5            | 8.29 ± 2.18   | 8.16 ± 2.40   | 6.52 ± 1.95   | 0.993            | <b>0.022</b>     | 0.049        |
| PC ae C38:0            | 1.40 ± 0.32   | 1.41 ± 0.50   | 0.92 ± 0.34   | 0.665            | <b>&lt;0.001</b> | <b>0.001</b> |
| PC ae C38:1            | 0.79 ± 0.14   | 0.72 ± 0.15   | 0.64 ± 0.20   | 0.311            | <b>0.008</b>     | 0.282        |
| PC ae C38:2            | 1.43 ± 0.26   | 1.32 ± 0.25   | 1.19 ± 0.34   | 0.312            | <b>0.012</b>     | 0.338        |
| PC ae C38:3            | 3.09 ± 0.56   | 2.93 ± 0.56   | 2.63 ± 0.72   | 0.745            | <b>0.042</b>     | 0.276        |
| PC ae C38:4            | 9.40 ± 1.88   | 8.98 ± 1.67   | 8.66 ± 1.77   | 0.762            | 0.433            | 0.915        |
| PC ae C38:5            | 13.4 ± 2.4    | 13.1 ± 2.7    | 12.1 ± 2.5    | 0.892            | 0.173            | 0.491        |
| PC ae C38:6            | 5.08 ± 1.02   | 5.04 ± 1.38   | 4.02 ± 1.02   | 0.612            | <b>0.003</b>     | <b>0.011</b> |
| PC ae C40:1            | 1.22 ± 0.18   | 1.17 ± 0.34   | 0.87 ± 0.27   | 0.159            | <b>&lt;0.001</b> | <b>0.003</b> |
| PC ae C40:2            | 1.34 ± 0.28   | 1.36 ± 0.27   | 1.18 ± 0.31   | 0.991            | 0.156            | 0.115        |
| PC ae C40:3            | 0.84 ± 0.16   | 0.80 ± 0.13   | 0.78 ± 0.23   | 0.631            | 0.112            | 0.115        |
| PC ae C40:4            | 1.73 ± 0.35   | 1.68 ± 0.27   | 1.67 ± 0.41   | 0.926            | 0.898            | 0.999        |
| PC ae C40:5            | 2.84 ± 0.50   | 2.84 ± 0.47   | 2.65 ± 0.58   | 1.000            | 0.521            | 0.565        |
| PC ae C40:6            | 3.20 ± 0.56   | 3.14 ± 0.70   | 2.75 ± 0.57   | 0.961            | <b>0.036</b>     | 0.112        |
| PC ae C42:1            | 0.30 ± 0.03   | 0.29 ± 0.06   | 0.26 ± 0.06   | 0.684            | <b>0.036</b>     | 0.242        |
| PC ae C42:2            | 0.56 ± 0.08   | 0.51 ± 0.11   | 0.45 ± 0.11   | 0.279            | <b>0.001</b>     | 0.083        |
| PC ae C42:3            | 0.64 ± 0.11   | 0.61 ± 0.13   | 0.52 ± 0.13   | 0.866            | <b>0.006</b>     | 0.047        |
| PC ae C42:4            | 0.82 ± 0.18   | 0.81 ± 0.14   | 0.79 ± 0.23   | 0.999            | 0.956            | 0.972        |
| PC ae C42:5            | 1.81 ± 0.34   | 1.83 ± 0.30   | 1.75 ± 0.35   | 0.987            | 0.922            | 0.814        |
| PC ae C44:3            | 0.09 ± 0.02   | 0.09 ± 0.02   | 0.08 ± 0.02   | 0.839            | <b>0.019</b>     | 0.122        |
| PC ae C44:4            | 0.39 ± 0.08   | 0.38 ± 0.07   | 0.35 ± 0.09   | 1.000            | 0.235            | 0.300        |
| PC ae C44:5            | 1.61 ± 0.39   | 1.62 ± 0.36   | 1.49 ± 0.37   | 0.995            | 0.643            | 0.550        |
| PC ae C44:6            | 1.09 ± 0.25   | 1.07 ± 0.20   | 1.00 ± 0.34   | 0.970            | 0.707            | 0.844        |
| <b>Sphingomyelins</b>  |               |               |               |                  |                  |              |
| SM (OH) C14:1          | 5.89 ± 1.30   | 5.4 ± 1.32    | 5.04 ± 1.13   | 0.419            | 0.071            | 0.662        |
| SM (OH) C16:1          | 2.49 ± 0.55   | 2.49 ± 0.56   | 2.36 ± 0.59   | 1.000            | 0.828            | 0.839        |
| SM (OH) C22:1          | 9.79 ± 1.97   | 9.17 ± 1.79   | 7.74 ± 2.00   | 0.109            | <b>0.002</b>     | <b>0.022</b> |
| SM (OH) C22:2          | 7.87 ± 1.53   | 7.29 ± 1.64   | 6.21 ± 1.63   | 0.444            | <b>0.002</b>     | 0.082        |
| SM (OH) C24:1          | 1.01 ± 0.27   | 0.95 ± 0.23   | 0.79 ± 0.21   | 0.297            | <b>0.007</b>     | 0.060        |
| SM C16:0               | 79 ± 13       | 78 ± 9        | 76 ± 10       | 0.969            | 0.633            | 0.807        |
| SM C16:1               | 12.9 ± 2.3    | 13.0 ± 2.4    | 11.7 ± 2.4    | 0.985            | 0.269            | 0.185        |
| SM C18:0               | 15 ± 3        | 17 ± 4        | 16 ± 3        | 0.068            | 0.731            | 0.647        |
| SM C18:1               | 7.02 ± 1.60   | 7.95 ± 1.98   | 7.13 ± 2.01   | <b>0.032</b>     | 0.927            | 0.105        |
| SM C20:2               | 0.31 ± 0.07   | 0.33 ± 0.09   | 0.30 ± 0.08   | 0.551            | 0.633            | 0.275        |
| SM C22:3               | 0.30 ± 0.14   | 0.41 ± 0.14   | 0.35 ± 0.16   | <b>0.010</b>     | 0.494            | 0.470        |
| SM C24:0               | 14.6 ± 2.9    | 14.6 ± 2.6    | 11.7 ± 2.6    | 0.968            | <b>0.001</b>     | <b>0.001</b> |
| SM C24:1               | 40.4 ± 6.84   | 42.9 ± 8.53   | 38.3 ± 5.43   | 0.416            | 0.707            | 0.112        |
| SM C26:0               | 0.17 ± 0.05   | 0.16 ± 0.04   | 0.13 ± 0.04   | 0.354            | <b>0.008</b>     | 0.059        |
| SM C26:1               | 0.35 ± 0.08   | 0.38 ± 0.09   | 0.31 ± 0.07   | 0.423            | 0.208            | <b>0.015</b> |
| <b>Monosaccharides</b> |               |               |               |                  |                  |              |
| H1                     | 4003 ± 346    | 4363 ± 674    | 4734 ± 1321   | <b>0.039</b>     | <b>0.015</b>     | 0.458        |
| <b>Ratios and sums</b> |               |               |               |                  |                  |              |
| <b>Acylcarnitines</b>  |               |               |               |                  |                  |              |
| C2/C0                  | 0.170 ± 0.045 | 0.239 ± 0.079 | 0.254 ± 0.076 | <b>&lt;0.001</b> | <b>&lt;0.001</b> | 0.514        |
| (C2+C3)/C0             | 0.178 ± 0.045 | 0.248 ± 0.079 | 0.263 ± 0.077 | <b>&lt;0.001</b> | <b>&lt;0.001</b> | 0.543        |

|                                        |                 |                 |                 |                  |                  |              |
|----------------------------------------|-----------------|-----------------|-----------------|------------------|------------------|--------------|
| CPT-I-ratio                            | 0.009 ± 0.002   | 0.009 ± 0.002   | 0.012 ± 0.005   | <b>0.020</b>     | <b>&lt;0.001</b> | <b>0.034</b> |
| Total AC/C0                            | 0.214 ± 0.053   | 0.295 ± 0.089   | 0.320 ± 0.092   | <b>&lt;0.001</b> | <b>&lt;0.001</b> | 0.322        |
| Total AC-DC/Total AC                   | 0.0011 ± 0.0013 | 0.0017 ± 0.0015 | 0.0025 ± 0.0015 | 0.089            | <b>0.001</b>     | 0.068        |
| Total AC-OH/Total AC                   | 0.004 ± 0.0012  | 0.0003 ± 0.0006 | 0.0008 ± 0.0016 | 0.786            | 0.656            | 0.766        |
| <b>Amino acids and biogenic amines</b> |                 |                 |                 |                  |                  |              |
| ADMA/Arg                               | 0.005 ± 0.002   | 0.005 ± 0.002   | 0.005 ± 0.001   | 0.213            | 0.869            | 0.156        |
| Aromatic AA                            | 201 ± 29        | 208 ± 28        | 204 ± 47        | 0.317            | 0.920            | 0.405        |
| BCAA                                   | 463 ± 72        | 491 ± 102       | 476 ± 114       | 0.417            | 0.797            | 0.444        |
| Calc. SDMA/Arg                         | 0.003 ± 0.001   | 0.003 ± 0.001   | 0.004 ± 0.002   | 0.992            | 0.776            | 0.653        |
| Cit/Arg                                | 0.341 ± 0.084   | 0.345 ± 0.088   | 0.290 ± 0.136   | 1.000            | <b>0.048</b>     | <b>0.046</b> |
| Cit/Orn                                | 0.453 ± 0.122   | 0.406 ± 0.103   | 0.443 ± 0.126   | 0.172            | 0.820            | 0.891        |
| Essential AA                           | 1076 ± 120      | 1106 ± 161      | 1056 ± 219      | 0.507            | 0.226            | 0.192        |
| Fischer ratio                          | 2.326 ± 0.345   | 2.352 ± 0.335   | 2.358 ± 0.410   | 0.871            | 0.941            | 0.928        |
| Glucogenic AA                          | 872 ± 139       | 815 ± 80        | 820 ± 132       | 0.121            | 0.668            | 0.936        |
| Kyn/Trp                                | 0.042 ± 0.008   | 0.044 ± 0.012   | 0.060 ± 0.033   | 0.561            | <b>0.038</b>     | 0.132        |
| MetSO/Met                              | 0.025 ± 0.009   | 0.030 ± 0.009   | 0.031 ± 0.017   | <b>0.027</b>     | 0.215            | 0.761        |
| Non-essential AA                       | 2034 ± 242      | 1947 ± 165      | 1961 ± 339      | 0.076            | 0.158            | 0.685        |
| Orn/Arg                                | 0.80 ± 0.26     | 0.88 ± 0.25     | 0.68 ± 0.29     | 0.137            | <b>0.045</b>     | 0.002        |
| Putrescine/Orn                         | 0.0015 ± 0.0008 | 0.0014 ± 0.0008 | 0.0016 ± 0.0010 | 0.766            | 0.783            | 0.644        |
| Ser/Trp                                | 0.0036 ± 0.0010 | 0.0038 ± 0.0015 | 0.0040 ± 0.0014 | 0.946            | 0.322            | 0.431        |
| Spermidine/Putrescine                  | 2.28 ± 1.11     | 2.19 ± 0.94     | 2.25 ± 1.23     | 0.803            | 0.739            | 0.895        |
| Spermine/Spermidine                    | 0.92 ± 0.14     | 0.93 ± 0.23     | 0.92 ± 0.12     | 0.892            | 0.811            | 0.804        |
| Total AA                               | 3232 ± 326      | 3183 ± 282      | 3134 ± 572      | 0.499            | 0.158            | 0.301        |
| Total DMA/Arg                          | 0.008 ± 0.002   | 0.008 ± 0.002   | 0.008 ± 0.003   | 0.218            | 0.369            | 0.839        |
| Tyr/Phe                                | 0.936 ± 0.136   | 0.966 ± 0.138   | 0.918 ± 0.123   | 0.868            | 1.000            | 0.941        |
| <b>Lipids</b>                          |                 |                 |                 |                  |                  |              |
| MUFA PC                                | 198 ± 43        | 199 ± 46        | 166 ± 28        | 0.745            | <b>0.007</b>     | <b>0.004</b> |
| MUFA PC/SFA PC                         | 10.16 ± 1.71    | 10.37 ± 1.20    | 10.42 ± 1.50    | 0.941            | 0.920            | 0.999        |
| PUFA PC                                | 940 ± 98        | 949 ± 167       | 788 ± 141       | 0.991            | <b>0.001</b>     | <b>0.001</b> |
| PUFA PC/MUFA PC                        | 4.89 ± 0.82     | 4.88 ± 0.63     | 4.80 ± 0.76     | 0.850            | 0.474            | 0.368        |
| PUFA PC/SFA PC                         | 48.6 ± 5.1      | 50.3 ± 6.8      | 49.5 ± 7.2      | 0.695            | 0.961            | 0.969        |
| SFA PC                                 | 19.6 ± 3.2      | 19.3 ± 4.6      | 16.1 ± 3.1      | 0.988            | <b>0.007</b>     | <b>0.021</b> |
| Total lysoPC                           | 233 ± 38        | 201 ± 38        | 172 ± 46        | <b>0.007</b>     | <b>&lt;0.001</b> | 0.056        |
| Total lysoPC/total PC                  | 5.07 ± 0.91     | 5.94 ± 1.32     | 5.90 ± 1.38     | <b>0.005</b>     | <b>0.029</b>     | 0.605        |
| Total PC                               | 1157 ± 129      | 1167 ± 210      | 970 ± 163       | 0.994            | <b>0.001</b>     | <b>0.001</b> |
| Total PC aa                            | 1039 ± 118      | 1055 ± 197      | 870 ± 147       | 0.969            | <b>0.001</b>     | <b>0.001</b> |
| Total PC ae                            | 119 ± 18        | 112 ± 18        | 100 ± 21        | 0.462            | <b>0.004</b>     | 0.113        |
| Total (PC+SM)                          | 1355 ± 153      | 1368 ± 230      | 1154 ± 184      | 0.991            | <b>0.001</b>     | <b>0.001</b> |
| Total SM                               | 198 ± 33        | 201 ± 29        | 184 ± 27        | 0.969            | 0.335            | 0.203        |
| Total SM (non-OH)                      | 171 ± 28        | 176 ± 25        | 162 ± 23        | 0.854            | 0.586            | 0.253        |
| Total SM (OH)                          | 27.04 ± 5.24    | 25.33 ± 5.06    | 22.14 ± 5.21    | 0.506            | <b>0.006</b>     | 0.129        |
| Total SM (OH)/<br>total SM (non-OH)    | 0.158 ± 0.016   | 0.144 ± 0.021   | 0.136 ± 0.021   | <b>0.020</b>     | <b>&lt;0.001</b> | 0.358        |
| Total SM/total PC                      | 0.171 ± 0.021   | 0.175 ± 0.022   | 0.192 ± 0.021   | 0.879            | <b>0.004</b>     | <b>0.027</b> |
| Total SM/total PL pool                 | 0.124 ± 0.014   | 0.129 ± 0.013   | 0.140 ± 0.013   | 0.441            | <b>&lt;0.001</b> | <b>0.028</b> |

AA, amino acid; AC, acylcarnitine; AC-DC, dicarboxyacylcarnitine; AC-OH, hydroxylated acylcarnitine; Arg, arginine; BCAA, branched chain amino acid; Cit, citrulline; DMA, dimethylarginine; Kyn, kynurenine; lysoPC, monoacyl-glycerophosphocholine;

Met, methionine; MetSO, methionine sulfoxide; MUFA, mono-unsaturated fatty acid; Orn, ornithine; PC aa, diacyl-glycerophosphocholine; PC ae, alkyl-acyl-glycerophosphocholine; Phe, phenylalanine; PL, phospholipid; PUFA, polyunsaturated fatty acid; SFA, saturated fatty acid; Ser, serine; SM, sphingomyelin; Trp, tryptophan; Tyr, tyrosine; data are expressed in  $\mu\text{M}$  as means  $\pm$  standard deviation; P-values are assessed by ANOVA (Benjamini-Hochberg or Tamhane post hoc analysis) or Kruskal-Wallis test; P-values  $<0.05$  were considered to indicate statistical significance and are marked in bold; metabolites are sorted in alphabetical order.

**Table S2.** Top 10 metabolites positive and negative correlated with control to adenoma to carcinoma sequence.

| Positive correlation |                                    | Negative correlation |                |
|----------------------|------------------------------------|----------------------|----------------|
|                      | Spearman's rank correlation factor |                      |                |
| Total AC/C0          | 0.544                              | -0.516               | PC aa C34:4    |
| C2/C0                | 0.526                              | -0.503               | PC aa C32:2    |
| (C2+C3)/C0           | 0.526                              | -0.498               | Total lysoPC   |
| C14:1                | 0.499                              | -0.475               | LysoPC a C17:0 |
| C18:1                | 0.455                              | -0.474               | LysoPC a C18:2 |
| C14:2                | 0.431                              | -0.459               | PC aa C36:6    |
| CPT-I-ratio          | 0.430                              | -0.459               | PC aa C32:3    |
| C2                   | 0.430                              | -0.458               | LysoPC a C18:0 |
| Total DMA            | 0.427                              | -0.450               | PC ae C40:1    |
| C12:1                | 0.409                              | -0.447               | PC aa C34:3    |

AC, acylcarnitine; DMA, dimethylarginine; lysoPC, monoacyl-glycerophosphocholine; PC aa, diacyl-glycerophosphocholine.

**Table S3.** Top 10 metabolites positive and negative correlated with the total amount of DMA.

| Positive correlation |                                    | Negative correlation |                |
|----------------------|------------------------------------|----------------------|----------------|
|                      | Spearman's rank correlation factor |                      |                |
| Calc. SDMA           | 0.653                              | -0.468               | LysoPC a C18:2 |
| Total DMA/Arg        | 0.595                              | -0.417               | Total lysoPC   |
| Calc. SDMA/Arg       | 0.593                              | -0.398               | LysoPC a C18:0 |
| C18:1                | 0.480                              | -0.380               | LysoPC a C20:3 |
| ADMA                 | 0.461                              | -0.360               | PC aa C34:4    |
| CPT-I-ratio          | 0.456                              | -0.356               | PC aa C32:2    |
| Total AC/C0          | 0.446                              | -0.336               | PC aa C32:3    |
| C6 (C4:1-DC)         | 0.439                              | -0.334               | LysoPC a C28:0 |
| Total AC-DC/Total AC | 0.424                              | -0.329               | PC aa C36:6    |
| C2/C0                | 0.418                              | -0.322               | LysoPC a C16:0 |

AC, acylcarnitine; DMA, dimethylarginine; lysoPC, monoacyl-glycerophosphocholine; PC aa, diacyl-glycerophosphocholine; SDMA, symmetric dimethylarginine.

**Table S4.** Top 10 metabolites positive and negative correlated with kynurenine to tryptophan ratio.

| Positive correlation   |                                    | Negative correlation |                |
|------------------------|------------------------------------|----------------------|----------------|
|                        | Spearman's rank correlation factor |                      |                |
| Kynurenine             | 0.717                              | -0.438               | PC aa C24:0    |
| Creatinine             | 0.395                              | -0.434               | LysoPC a C26:1 |
| Total SM/Total PL pool | 0.377                              | -0.422               | LysoPC a C24:0 |
| Calc. SDMA             | 0.373                              | -0.379               | LysoPC a C26:0 |
| Calc. SDMA/Arg         | 0.353                              | -0.374               | LysoPC a C16:0 |
| Total AC/C0            | 0.343                              | -0.339               | PC aa C34:4    |
| Total SM/Total PC      | 0.333                              | -0.329               | LysoPC a C16:1 |
| C2                     | 0.325                              | -0.320               | Total lysoPC   |

|             |       |        |             |
|-------------|-------|--------|-------------|
| CPT-I-ratio | 0.324 | -0.307 | PC ae C44:3 |
| C2/C0       | 0.323 | -0.300 | PC aa C36:4 |

AC, acylcarnitine; lysoPC, monoacyl-glycerophosphocholine; PC aa, diacyl-glycerophosphocholine; SDMA, symmetric dimethylarginine; SM, sphingomyelin.

**Table S5.** Summary of top 10 metabolites derived from single ROC analysis, based on area under the curve values (AUC) as percentages.

| Ctrl vs. CRC | AUC (%) | C.I. (95%) | Ctrl vs. AA    | AUC (%) | C.I. (95%) |
|--------------|---------|------------|----------------|---------|------------|
| PC aa C34:4  | 90.7    | 82.4-97.0  | (C2+C3)/C0     | 78.7    | 65.4-89.0  |
| PC aa C36:6  | 89.7    | 80.6-97.0  | Total AC/C0    | 78.4    | 65.7-89.1  |
| PC aa C32:2  | 87.3    | 77.2-95.4  | C2/C0          | 78.3    | 66.2-88.3  |
| Total AC/C0  | 86.7    | 75.3-95.1  | C14:1          | 76.2    | 63.7-87.1  |
| PC ae C40:1  | 86.3    | 75.1-94.5  | C2             | 75.6    | 63.7-86.2  |
| PC aa C36:5  | 86.0    | 75.1-94.6  | LysoPC a C17:0 | 74.8    | 61.4-86.3  |
| PC aa C42:6  | 85.8    | 72.2-95.7  | C10:1          | 72.7    | 59.2-83.2  |
| C2/C0        | 85.6    | 75.8-94.5  | SM C22:3       | 72.3    | 60.4-84.3  |
| (C2+C3)/C0   | 85.3    | 74.1-93.9  | LysoPC a C18:0 | 71.8    | 60.3-83.3  |
| PC ae C38:0  | 85.2    | 74.0-94.5  | C14:2          | 71.7    | 59.4-83.3  |

  

| AA vs. CRC  | AUC (%) | C.I. (95%) |
|-------------|---------|------------|
| PC aa C36:5 | 83.1    | 70.5-93.5  |
| SM C24:0    | 80.4    | 65.0-91.5  |
| PC ae C38:0 | 80.0    | 64.7-92.0  |
| PC aa C36:6 | 79.8    | 66.9-91.8  |
| PC aa C42:6 | 78.4    | 66.0-89.4  |
| PC aa C34:4 | 78.1    | 63.4-90.7  |
| PC aa C38:5 | 77.0    | 62.2-89.6  |
| Total PC aa | 77.0    | 62.4-89.0  |
| Orn/Arg     | 76.8    | 61.3-90.0  |
| Total PC    | 76.6    | 61.6-88.2  |

AC, acylcarnitine; lysoPC, monoacyl-glycerophosphocholine; PC aa, diacyl-glycerophosphocholine; PC ae, alkyl-acyl-glycerophosphocholine; SM, sphingomyelin.

**Table S6.** List of metabolites of the metabolomics analysis of both validation cohorts.

| (μM)                  | Validation CRC  |               |              | Validation AA   |               |         |
|-----------------------|-----------------|---------------|--------------|-----------------|---------------|---------|
|                       | Ctrl<br>(n= 29) | CRC<br>(n=48) | P-value      | Ctrl<br>(n= 28) | AA<br>(n=48)  | P-value |
| <b>Acylcarnitines</b> |                 |               |              |                 |               |         |
| C0                    | 42 ± 9          | 44 ± 11       | 0.427        | 45 ± 9          | 44 ± 9        | 0.547   |
| C2                    | 8.35 ± 3.87     | 9.43 ± 2.95   | 0.172        | 7.86 ± 3.28     | 8.54 ± 2.70   | 0.063   |
| C3                    | 0.36 ± 0.09     | 0.38 ± 0.14   | 0.975        | 0.43 ± 0.13     | 0.41 ± 0.14   | 0.426   |
| C3-DC (C4-OH)         | 0.04 ± 0.02     | 0.06 ± 0.03   | <b>0.012</b> | 0.04 ± 0.05     | 0.04 ± 0.03   | 0.387   |
| C4                    | 0.19 ± 0.06     | 0.21 ± 0.09   | 0.542        | 0.20 ± 0.07     | 0.23 ± 0.16   | 0.419   |
| C5                    | 0.13 ± 0.04     | 0.14 ± 0.07   | 0.821        | 0.15 ± 0.04     | 0.14 ± 0.04   | 0.267   |
| C6 (C4:1-DC)          | 0.07 ± 0.03     | 0.08 ± 0.03   | 0.697        | 0.07 ± 0.04     | 0.08 ± 0.03   | 0.245   |
| C7-DC                 | 0.035 ± 0.021   | 0.048 ± 0.023 | <b>0.004</b> | 0.040 ± 0.021   | 0.038 ± 0.022 | 0.948   |
| C8                    | 0.20 ± 0.09     | 0.22 ± 0.11   | 0.690        | 0.21 ± 0.13     | 0.24 ± 0.11   | 0.071   |
| C9                    | 0.05 ± 0.02     | 0.04 ± 0.02   | 0.220        | 0.05 ± 0.02     | 0.05 ± 0.02   | 0.628   |
| C10                   | 0.31 ± 0.13     | 0.35 ± 0.16   | 0.403        | 0.32 ± 0.20     | 0.36 ± 0.17   | 0.085   |
| C10:1                 | 0.14 ± 0.07     | 0.15 ± 0.07   | 0.662        | 0.16 ± 0.08     | 0.15 ± 0.09   | 0.490   |

|          |               |               |              |               |               |       |
|----------|---------------|---------------|--------------|---------------|---------------|-------|
| C10:2    | <LOQ          | <LOQ          | -            | <LOQ          | <LOQ          | -     |
| C12      | 0.11 ± 0.07   | 0.14 ± 0.05   | <b>0.031</b> | 0.12 ± 0.08   | 0.12 ± 0.07   | 0.812 |
| C12:1    | 0.09 ± 0.08   | 0.13 ± 0.07   | <b>0.022</b> | 0.11 ± 0.08   | 0.11 ± 0.07   | 0.607 |
| C14      | 0.04 ± 0.02   | 0.05 ± 0.01   | 0.101        | 0.04 ± 0.02   | 0.04 ± 0.01   | 0.932 |
| C14:1    | 0.11 ± 0.05   | 0.14 ± 0.05   | <b>0.018</b> | 0.11 ± 0.05   | 0.11 ± 0.04   | 0.630 |
| C14:1-OH | 0.013 ± 0.010 | 0.016 ± 0.009 | 0.192        | 0.02 ± 0.01   | 0.02 ± 0.01   | 0.742 |
| C14:2    | 0.03 ± 0.02   | 0.04 ± 0.02   | 0.131        | 0.03 ± 0.02   | 0.04 ± 0.01   | 0.528 |
| C16      | 0.12 ± 0.03   | 0.14 ± 0.03   | <b>0.032</b> | 0.13 ± 0.04   | 0.13 ± 0.03   | 0.923 |
| C16:1    | 0.029 ± 0.027 | 0.048 ± 0.023 | <b>0.005</b> | <LOQ          | <LOQ          | -     |
| C16:1-OH | 0.010 ± 0.005 | 0.011 ± 0.005 | 0.174        | 0.009 ± 0.007 | 0.009 ± 0.006 | 0.550 |
| C16:2    | 0.005 ± 0.005 | 0.009 ± 0.006 | <b>0.029</b> | <LOQ          | <LOQ          | -     |
| C18      | 0.06 ± 0.01   | 0.06 ± 0.01   | 0.440        | 0.07 ± 0.02   | 0.06 ± 0.01   | 0.178 |
| C18:1    | 0.15 ± 0.05   | 0.18 ± 0.04   | <b>0.013</b> | 0.15 ± 0.07   | 0.15 ± 0.04   | 0.299 |
| C18:2    | 0.046 ± 0.017 | 0.052 ± 0.017 | 0.136        | 0.051 ± 0.018 | 0.048 ± 0.012 | 0.991 |

**Amino acids**

|     |           |           |              |          |           |              |
|-----|-----------|-----------|--------------|----------|-----------|--------------|
| Ala | 442 ± 77  | 431 ± 90  | 0.592        | 339 ± 65 | 346 ± 82  | 0.914        |
| Arg | 134 ± 27  | 134 ± 28  | 0.939        | 127 ± 24 | 125 ± 28  | 0.714        |
| Asn | 45 ± 9    | 43 ± 9    | 0.269        | 36 ± 8   | 38 ± 7    | 0.310        |
| Asp | 26 ± 12   | 24 ± 11   | 0.328        | 25 ± 6   | 28 ± 8    | <b>0.035</b> |
| Cit | 38 ± 12   | 37 ± 11   | 0.603        | 28 ± 10  | 33 ± 8    | <b>0.015</b> |
| Gln | 624 ± 109 | 607 ± 103 | 0.507        | 666 ± 99 | 710 ± 111 | 0.088        |
| Glu | 105 ± 52  | 99 ± 45   | 0.781        | 102 ± 33 | 102 ± 59  | 0.594        |
| Gly | 306 ± 63  | 276 ± 77  | <b>0.028</b> | 249 ± 52 | 288 ± 68  | <b>0.014</b> |
| His | 92 ± 12   | 86 ± 12   | <b>0.034</b> | 91 ± 13  | 89 ± 10   | 0.657        |
| Ile | 66 ± 18   | 81 ± 23   | <b>0.003</b> | 82 ± 22  | 81 ± 18   | 0.803        |
| Leu | 150 ± 44  | 164 ± 39  | 0.156        | 166 ± 37 | 167 ± 33  | 0.877        |
| Lys | 213 ± 33  | 205 ± 32  | 0.272        | 197 ± 27 | 196 ± 32  | 0.907        |
| Met | 21 ± 5    | 22 ± 4    | 0.358        | 24 ± 9   | 23 ± 6    | 0.689        |
| Orn | 89 ± 25   | 88 ± 24   | 0.748        | 81 ± 18  | 89 ± 20   | 0.073        |
| Phe | 74 ± 17   | 75 ± 12   | 0.854        | 80 ± 14  | 81 ± 14   | 0.778        |
| Pro | 145 ± 30  | 155 ± 39  | 0.424        | 198 ± 51 | 191 ± 51  | 0.527        |
| Ser | 157 ± 30  | 149 ± 27  | 0.261        | 136 ± 23 | 150 ± 20  | <b>0.007</b> |
| Thr | 116 ± 26  | 114 ± 22  | 0.810        | 99 ± 22  | 109 ± 22  | 0.063        |
| Trp | 62 ± 10   | 59 ± 9    | 0.152        | 63 ± 13  | 61 ± 14   | 0.596        |
| Tyr | 70 ± 17   | 73 ± 17   | 0.446        | 80 ± 23  | 75 ± 20   | 0.240        |
| Val | 207 ± 45  | 217 ± 38  | 0.262        | 247 ± 41 | 244 ± 36  | 0.715        |

**Biogenic amines**

|            |             |             |              |             |             |              |
|------------|-------------|-------------|--------------|-------------|-------------|--------------|
| AcOrn      | 1.12 ± 0.60 | 1.51 ± 0.99 | 0.219        | 0.97 ± 0.53 | 1.10 ± 0.68 | 0.407        |
| ADMA       | 0.55 ± 0.11 | 0.57 ± 0.15 | 0.748        | 0.65 ± 0.09 | 0.67 ± 0.12 | 0.291        |
| Alpha AAA  | 0.69 ± 0.28 | 0.74 ± 0.27 | 0.233        | 0.19 ± 0.37 | 0.14 ± 0.30 | 0.626        |
| Creatinine | 72 ± 16     | 81 ± 19     | <b>0.038</b> | 84 ± 20     | 78 ± 20     | 0.193        |
| Kynurenine | 2.93 ± 0.85 | 3.04 ± 0.86 | 0.528        | 3.97 ± 0.88 | 3.71 ± 1.15 | 0.306        |
| MetSO      | 1.99 ± 2.31 | 1.86 ± 2.35 | 0.574        | 2.17 ± 2.50 | 1.24 ± 2.03 | <b>0.006</b> |
| Putrescine | 0.13 ± 0.09 | 0.13 ± 0.07 | 0.846        | 0.17 ± 0.05 | 0.16 ± 0.06 | 0.386        |
| Serotonin  | 0.65 ± 0.36 | 0.80 ± 0.51 | 0.274        | 0.69 ± 0.32 | 0.68 ± 0.45 | 0.659        |
| Spermidine | 0.13 ± 0.06 | 0.15 ± 0.05 | 0.168        | 0.18 ± 0.06 | 0.19 ± 0.04 | 0.261        |



|                             |              |               |                  |               |               |              |
|-----------------------------|--------------|---------------|------------------|---------------|---------------|--------------|
| Spermine                    | 0.16 ± 0.04  | 0.16 ± 0.03   | 0.176            | 0.20 ± 0.14   | 0.19 ± 0.14   | 0.783        |
| Taurine                     | 107 ± 37     | 98 ± 35       | 0.278            | 77 ± 39       | 89 ± 35       | 0.059        |
| Total DMA                   | 1.29 ± 0.19  | 1.40 ± 0.31   | 0.131            | 0.87 ± 0.25   | 0.90 ± 0.20   | 0.369        |
| OH-Pro                      | <LOQ         | <LOQ          | -                | <LOQ          | <LOQ          | -            |
| Sarcosine                   | 4.31 ± 1.00  | 4.46 ± 1.32   | 0.871            | 4.30 ± 1.18   | 4.75 ± 1.06   | 0.096        |
| <b>Glycerophospholipids</b> |              |               |                  |               |               |              |
| LysoPC a C16:0              | 152 ± 28     | 145 ± 38      | 0.305            | 138 ± 37      | 143 ± 35      | 0.576        |
| LysoPC a C16:1              | 4.15 ± 1.13  | 3.97 ± 1.72   | 0.374            | 3.89 ± 1.29   | 4.12 ± 1.42   | 0.489        |
| LysoPC a C17:0              | 3.01 ± 0.76  | 2.31 ± 0.77   | <b>&lt;0.001</b> | 2.31 ± 0.89   | 2.60 ± 0.70   | 0.120        |
| LysoPC a C18:0              | 40 ± 8       | 34 ± 11       | <b>0.007</b>     | 34 ± 10       | 37 ± 9        | 0.243        |
| LysoPC a C18:1              | 26 ± 5       | 25 ± 8        | 0.087            | 24 ± 8        | 25 ± 8        | 0.543        |
| LysoPC a C18:2              | 33 ± 9       | 28 ± 10       | <b>0.016</b>     | 31 ± 11       | 30 ± 11       | 0.636        |
| LysoPC a C20:3              | 2.57 ± 0.72  | 2.22 ± 0.81   | 0.058            | 2.32 ± 0.70   | 2.41 ± 0.74   | 0.602        |
| LysoPC a C20:4              | 8.40 ± 2.12  | 8.09 ± 2.92   | 0.270            | 8.12 ± 3.19   | 8.79 ± 2.62   | 0.151        |
| LysoPC a C24:0              | 0.22 ± 0.01  | 0.17 ± 0.10   | <b>&lt;0.001</b> | 0.22 ± 0.13   | 0.19 ± 0.06   | 0.779        |
| LysoPC a C26:0              | 0.41 ± 0.33  | 0.34 ± 0.33   | <b>0.002</b>     | 0.45 ± 0.37   | 0.33 ± 0.17   | 0.532        |
| LysoPC a C26:1              | 0.14 ± 0.09  | 0.11 ± 0.08   | <b>0.011</b>     | 0.16 ± 0.10   | 0.14 ± 0.06   | 0.504        |
| LysoPC a C28:0              | 0.38 ± 0.27  | 0.24 ± 0.33   | <b>0.002</b>     | 0.38 ± 0.32   | 0.31 ± 0.20   | 0.284        |
| LysoPC a C28:1              | 0.65 ± 0.27  | 0.48 ± 0.24   | <b>0.001</b>     | 0.56 ± 0.25   | 0.54 ± 0.19   | 0.872        |
| PC aa C24:0                 | 0.13 ± 0.09  | 0.08 ± 0.09   | <b>0.002</b>     | 0.14 ± 0.12   | 0.10 ± 0.07   | 0.389        |
| PC aa C28:1                 | 3.50 ± 0.96  | 2.95 ± 0.75   | <b>0.012</b>     | 3.00 ± 1.00   | 3.16 ± 0.71   | 0.463        |
| PC aa C30:0                 | 4.81 ± 1.83  | 3.93 ± 1.21   | <b>0.036</b>     | 3.99 ± 1.57   | 4.51 ± 1.52   | 0.162        |
| PC aa C32:0                 | 13.54 ± 2.70 | 13.34 ± 2.46  | 0.736            | 12.27 ± 4.67  | 12.89 ± 2.98  | 0.136        |
| PC aa C32:1                 | 14.22 ± 6.71 | 15.11 ± 8.22  | 0.475            | 14.03 ± 6.91  | 14.37 ± 6.23  | 0.590        |
| PC aa C32:2                 | 4.21 ± 2.07  | 2.76 ± 1.32   | <b>0.002</b>     | 3.06 ± 1.55   | 3.41 ± 1.31   | 0.142        |
| PC aa C32:3                 | 0.44 ± 0.14  | 0.33 ± 0.09   | <b>&lt;0.001</b> | 0.31 ± 0.10   | 0.37 ± 0.10   | <b>0.004</b> |
| PC aa C34:1                 | 181 ± 31     | 191 ± 39      | 0.271            | 174 ± 40      | 184 ± 38      | 0.304        |
| PC aa C34:2                 | 301 ± 49     | 283 ± 46      | 0.098            | 279 ± 65      | 290 ± 50      | 0.410        |
| PC aa C34:3                 | 16.32 ± 4.84 | 13.85 ± 4.71  | <b>0.030</b>     | 12.82 ± 4.24  | 14.78 ± 4.07  | 0.050        |
| PC aa C34:4                 | 1.80 ± 0.92  | 1.28 ± 0.58   | <b>0.009</b>     | 1.39 ± 0.54   | 1.69 ± 0.60   | <b>0.021</b> |
| PC aa C36:0                 | 3.84 ± 1.37  | 3.38 ± 1.34   | 0.064            | 3.59 ± 1.31   | 3.56 ± 0.93   | 0.821        |
| PC aa C36:1                 | 39.09 ± 8.07 | 37.01 ± 12.67 | 0.123            | 35.14 ± 10.22 | 37.92 ± 10.20 | 0.256        |
| PC aa C36:2                 | 207 ± 33     | 182 ± 43      | <b>0.008</b>     | 188 ± 47      | 196 ± 39      | 0.402        |
| PC aa C36:3                 | 114 ± 20     | 106 ± 27      | 0.202            | 102 ± 22      | 108 ± 23      | 0.250        |
| PC aa C36:4                 | 180 ± 39     | 181 ± 38      | 0.875            | 170 ± 46      | 188 ± 37      | <b>0.042</b> |
| PC aa C36:5                 | 22.17 ± 8.80 | 22.41 ± 10.51 | 0.709            | 20.17 ± 8.63  | 25.42 ± 12.30 | 0.106        |
| PC aa C36:6                 | 1.04 ± 0.58  | 0.75 ± 0.33   | <b>0.027</b>     | 0.82 ± 0.37   | 0.97 ± 0.37   | 0.054        |
| PC aa C38:0                 | 3.05 ± 0.78  | 2.70 ± 0.91   | <b>0.030</b>     | 2.72 ± 0.91   | 3.02 ± 0.68   | 0.109        |
| PC aa C38:1                 | 1.76 ± 0.79  | 1.50 ± 0.99   | <b>0.008</b>     | 1.62 ± 0.84   | 1.48 ± 0.54   | 0.767        |
| PC aa C38:3                 | 52 ± 14      | 46 ± 13       | 0.073            | 44 ± 10       | 49 ± 12       | 0.073        |
| PC aa C38:4                 | 102 ± 29     | 96 ± 22       | 0.255            | 92 ± 24       | 104 ± 21      | <b>0.018</b> |
| PC aa C38:5                 | 44 ± 11      | 43 ± 10       | 0.500            | 38 ± 9        | 46 ± 11       | <b>0.002</b> |
| PC aa C38:6                 | 73 ± 19      | 70 ± 18       | 0.504            | 60 ± 18       | 76 ± 21       | <b>0.001</b> |
| PC aa C40:1                 | 0.50 ± 0.34  | 0.42 ± 0.36   | 0.116            | 0.42 ± 0.45   | 0.30 ± 0.36   | 0.166        |
| PC aa C40:2                 | <LOQ         | <LOQ          | -                | <LOQ          | <LOQ          | -            |
| PC aa C40:3                 | 1.05 ± 0.65  | 0.94 ± 0.66   | 0.227            | 1.13 ± 0.72   | 0.93 ± 0.51   | 0.311        |

|             |              |              |                  |              |              |              |
|-------------|--------------|--------------|------------------|--------------|--------------|--------------|
| PC aa C40:4 | 3.66 ± 1.06  | 3.41 ± 1.02  | 0.326            | 3.61 ± 1.19  | 3.59 ± 1.04  | 0.659        |
| PC aa C40:5 | 11.61 ± 3.33 | 10.73 ± 2.87 | 0.291            | 9.98 ± 2.68  | 11.78 ± 3.49 | <b>0.027</b> |
| PC aa C40:6 | 25 ± 8       | 23 ± 7       | 0.235            | 20 ± 6       | 26 ± 8       | <b>0.003</b> |
| PC aa C42:0 | 0.66 ± 0.21  | 0.58 ± 0.20  | 0.070            | 0.60 ± 0.22  | 0.63 ± 0.18  | 0.349        |
| PC aa C42:1 | 0.33 ± 0.14  | 0.29 ± 0.13  | 0.154            | 0.32 ± 0.15  | 0.30 ± 0.11  | 0.829        |
| PC aa C42:2 | 0.33 ± 0.19  | 0.28 ± 0.17  | 0.090            | 0.35 ± 0.22  | 0.29 ± 0.14  | 0.260        |
| PC aa C42:4 | 0.35 ± 0.26  | 0.29 ± 0.24  | 0.107            | 0.37 ± 0.24  | 0.29 ± 0.19  | 0.306        |
| PC aa C42:5 | 0.46 ± 0.15  | 0.41 ± 0.16  | <b>0.040</b>     | 0.45 ± 0.16  | 0.45 ± 0.15  | 0.893        |
| PC aa C42:6 | 0.56 ± 0.16  | 0.46 ± 0.16  | <b>0.004</b>     | 0.50 ± 0.15  | 0.53 ± 0.14  | 0.146        |
| PC ae C30:0 | 0.53 ± 0.15  | 0.44 ± 0.14  | <b>0.010</b>     | 0.48 ± 0.21  | 0.49 ± 0.13  | 0.712        |
| PC ae C30:1 | <LOQ         | <LOQ         | -                | <LOQ         | <LOQ         | -            |
| PC ae C30:2 | 0.17 ± 0.09  | 0.14 ± 0.08  | <b>0.004</b>     | 0.16 ± 0.09  | 0.14 ± 0.06  | 0.628        |
| PC ae C32:1 | 2.67 ± 0.58  | 2.48 ± 0.47  | 0.115            | 2.47 ± 1.55  | 2.52 ± 0.53  | 0.840        |
| PC ae C32:2 | 0.65 ± 0.16  | 0.56 ± 0.12  | <b>0.017</b>     | 0.58 ± 0.32  | 0.60 ± 0.12  | 0.736        |
| PC ae C34:0 | 1.63 ± 0.44  | 1.33 ± 0.32  | <b>0.005</b>     | 1.27 ± 0.40  | 1.45 ± 0.38  | 0.057        |
| PC ae C34:1 | 8.72 ± 1.75  | 7.84 ± 1.69  | <b>0.032</b>     | 6.97 ± 2.11  | 7.90 ± 1.65  | <b>0.035</b> |
| PC ae C34:2 | 9.13 ± 1.72  | 7.68 ± 2.46  | <b>0.003</b>     | 7.15 ± 2.39  | 8.27 ± 2.03  | <b>0.033</b> |
| PC ae C34:3 | 7.40 ± 2.14  | 6.14 ± 1.91  | <b>0.009</b>     | 6.19 ± 2.22  | 6.65 ± 1.86  | 0.643        |
| PC ae C36:0 | 1.05 ± 0.27  | 1.04 ± 0.28  | 0.805            | 1.01 ± 0.32  | 1.00 ± 0.23  | 0.651        |
| PC ae C36:1 | 8.89 ± 4.84  | 7.11 ± 3.70  | <b>0.024</b>     | 7.58 ± 3.79  | 7.06 ± 2.86  | 0.970        |
| PC ae C36:2 | 14.60 ± 3.44 | 11.52 ± 3.51 | <b>&lt;0.001</b> | 11.01 ± 3.26 | 12.19 ± 3.32 | 0.142        |
| PC ae C36:3 | 6.56 ± 1.14  | 5.66 ± 1.85  | <b>0.010</b>     | 5.52 ± 1.60  | 6.14 ± 1.49  | 0.091        |
| PC ae C36:4 | 16.86 ± 3.75 | 16.57 ± 4.41 | 0.765            | 16.13 ± 4.30 | 18.22 ± 3.98 | <b>0.035</b> |
| PC ae C36:5 | 10.44 ± 2.74 | 10.17 ± 2.50 | 0.659            | 10.28 ± 2.93 | 11.47 ± 2.55 | 0.067        |
| PC ae C38:0 | 2.00 ± 0.70  | 1.64 ± 0.50  | <b>0.026</b>     | 1.67 ± 0.60  | 1.94 ± 0.56  | <b>0.018</b> |
| PC ae C38:1 | <LOQ         | <LOQ         | -                | <LOQ         | <LOQ         | -            |
| PC ae C38:2 | <LOQ         | <LOQ         | -                | <LOQ         | <LOQ         | -            |
| PC ae C38:3 | 7.27 ± 4.80  | 5.79 ± 3.78  | <b>0.037</b>     | 6.95 ± 4.33  | 5.76 ± 3.51  | 0.454        |
| PC ae C38:4 | 13.51 ± 2.96 | 12.03 ± 2.07 | <b>0.011</b>     | 11.87 ± 2.45 | 13.08 ± 2.38 | <b>0.037</b> |
| PC ae C38:5 | 17.11 ± 3.45 | 16.79 ± 3.80 | 0.719            | 16.07 ± 3.99 | 18.27 ± 3.43 | <b>0.013</b> |
| PC ae C38:6 | 6.82 ± 1.70  | 6.29 ± 1.78  | 0.205            | 5.92 ± 1.53  | 7.19 ± 1.60  | <b>0.001</b> |
| PC ae C40:1 | 1.56 ± 0.63  | 1.28 ± 0.57  | <b>0.021</b>     | 1.56 ± 0.74  | 1.46 ± 0.50  | 0.996        |
| PC ae C40:2 | 2.72 ± 1.10  | 2.43 ± 1.08  | 0.117            | 2.38 ± 1.04  | 2.35 ± 0.81  | 0.702        |
| PC ae C40:3 | 2.38 ± 2.22  | 1.90 ± 1.93  | <b>0.044</b>     | 2.54 ± 2.04  | 1.85 ± 1.81  | 0.491        |
| PC ae C40:4 | 3.84 ± 1.80  | 3.25 ± 1.42  | 0.069            | 3.76 ± 1.64  | 3.36 ± 1.37  | 0.322        |
| PC ae C40:5 | 4.34 ± 1.96  | 3.70 ± 1.33  | 0.112            | 4.09 ± 1.62  | 3.90 ± 1.26  | 0.617        |
| PC ae C40:6 | 5.28 ± 1.27  | 4.54 ± 1.21  | <b>0.009</b>     | 4.23 ± 1.02  | 5.05 ± 1.00  | <b>0.001</b> |
| PC ae C42:1 | 0.64 ± 0.39  | 0.54 ± 0.41  | 0.057            | 0.69 ± 0.47  | 0.55 ± 0.35  | 0.369        |
| PC ae C42:2 | 0.77 ± 0.35  | 0.66 ± 0.32  | 0.114            | 0.76 ± 0.39  | 0.69 ± 0.27  | 0.598        |
| PC ae C42:3 | 1.06 ± 0.49  | 0.90 ± 0.45  | 0.081            | 1.05 ± 0.52  | 0.95 ± 0.36  | 0.441        |
| PC ae C42:4 | 1.10 ± 0.38  | 0.97 ± 0.33  | 0.074            | 1.05 ± 0.36  | 1.00 ± 0.33  | 0.494        |
| PC ae C42:5 | 2.77 ± 0.85  | 2.53 ± 0.62  | 0.247            | 2.62 ± 0.76  | 2.63 ± 0.63  | 0.851        |
| PC ae C44:3 | 0.21 ± 0.14  | 0.19 ± 0.15  | 0.089            | 0.22 ± 0.15  | 0.19 ± 0.11  | 0.730        |
| PC ae C44:4 | 0.51 ± 0.15  | 0.47 ± 0.12  | 0.207            | 0.46 ± 0.13  | 0.47 ± 0.12  | 0.464        |
| PC ae C44:5 | 1.94 ± 0.62  | 1.89 ± 0.45  | 0.866            | 1.82 ± 0.72  | 2.00 ± 0.48  | 0.203        |
| PC ae C44:6 | 1.42 ± 0.49  | 1.29 ± 0.34  | 0.326            | 1.26 ± 0.39  | 1.37 ± 0.33  | 0.170        |

| <b>Sphingomyelins</b>                  |                    |                    |              |                    |                    |              |
|----------------------------------------|--------------------|--------------------|--------------|--------------------|--------------------|--------------|
| SM (OH) C14:1                          | 9.59 ± 2.20        | 8.07 ± 2.53        | <b>0.003</b> | 7.22 ± 2.26        | 8.04 ± 1.77        | 0.081        |
| SM (OH) C16:1                          | 5.05 ± 0.89        | 4.31 ± 1.21        | <b>0.005</b> | 3.70 ± 1.07        | 4.37 ± 0.89        | <b>0.004</b> |
| SM (OH) C22:1                          | 19.27 ± 4.18       | 16.12 ± 4.60       | <b>0.001</b> | 14.20 ± 3.43       | 16.71 ± 3.61       | <b>0.004</b> |
| SM (OH) C22:2                          | 19.10 ± 3.48       | 15.50 ± 4.85       | <b>0.001</b> | 13.51 ± 3.54       | 16.33 ± 3.51       | <b>0.001</b> |
| SM (OH) C24:1                          | 1.85 ± 0.41        | 1.64 ± 0.46        | <b>0.044</b> | 1.45 ± 0.35        | 1.71 ± 0.37        | <b>0.003</b> |
| SM C16:0                               | 143 ± 22           | 138 ± 22           | 0.345        | 122 ± 25           | 134 ± 19           | <b>0.025</b> |
| SM C16:1                               | 25.10 ± 4.60       | 22.69 ± 4.56       | <b>0.028</b> | 20.56 ± 4.72       | 23.08 ± 4.08       | <b>0.017</b> |
| SM C18:0                               | 33.75 ± 5.17       | 32.23 ± 5.85       | 0.252        | 27.21 ± 6.93       | 31.65 ± 5.03       | <b>0.005</b> |
| SM C18:1                               | 15.80 ± 2.82       | 14.11 ± 3.23       | <b>0.018</b> | 12.19 ± 3.37       | 14.72 ± 3.04       | <b>0.001</b> |
| SM C20:2                               | 0.89 ± 0.19        | 0.81 ± 0.16        | 0.066        | 0.68 ± 0.19        | 0.76 ± 0.12        | 0.054        |
| SM C22:3                               | 1.78 ± 0.46        | 2.04 ± 0.56        | <b>0.037</b> | 1.34 ± 0.44        | 1.45 ± 0.38        | 0.539        |
| SM C24:0                               | 32.29 ± 7.22       | 30.29 ± 6.80       | 0.310        | 27.36 ± 5.28       | 29.84 ± 5.44       | 0.057        |
| SM C24:1                               | 63.39 ± 11.56      | 66.52 ± 10.64      | 0.229        | 55.63 ± 12.91      | 64.34 ± 10.72      | <b>0.002</b> |
| SM C26:0                               | 0.30 ± 0.07        | 0.27 ± 0.09        | 0.081        | 0.25 ± 0.08        | 0.29 ± 0.07        | <b>0.036</b> |
| SM C26:1                               | 0.60 ± 0.12        | 0.61 ± 0.16        | 0.908        | 0.53 ± 0.17        | 0.61 ± 0.14        | <b>0.028</b> |
| <b>Monosaccharides</b>                 |                    |                    |              |                    |                    |              |
| H1                                     | 5798 ± 1731        | 6070 ± 1932        | 0.418        | 5481 ± 1280        | 5636 ± 1495        | 0.698        |
| <b>Ratios and sums</b>                 |                    |                    |              |                    |                    |              |
| <b>Acylcarnitines</b>                  |                    |                    |              |                    |                    |              |
| C2/C0                                  | 0.203 ± 0.92       | 0.231 ± 0.100      | 0.211        | 0.180 ± 0.090      | 0.201 ± 0.074      | 0.085        |
| (C2+C3)/C0                             | 0.212 ± 0.92       | 0.239 ± 0.100      | 0.223        | 0.190 ± 0.090      | 0.211 ± 0.074      | 0.079        |
| CPT-I-ratio                            | 0.011 ± 0.04       | 0.013 ± 0.006      | 0.138        | 0.010 ± 0.005      | 0.010 ± 0.003      | 0.338        |
| Total AC/C0                            | 0.262 ± 0.108      | 0.298 ± 0.125      | 0.192        | 0.238 ± 0.106      | 0.263 ± 0.086      | 0.085        |
| Total AC-DC/Total AC                   | 0.0034 ±<br>0.0011 | 0.0040 ±<br>0.0013 | <b>0.029</b> | 0.0033 ±<br>0.0018 | 0.0035 ±<br>0.0015 | 0.627        |
| Total AC-OH/Total AC                   | 0.0018 ±<br>0.0007 | 0.0022 ±<br>0.0010 | <b>0.027</b> | 0.0016 ±<br>0.0014 | 0.0016 ±<br>0.0011 | 0.838        |
| <b>Amino acids and biogenic amines</b> |                    |                    |              |                    |                    |              |
| ADMA/Arg                               | 0.0042 ±<br>0.0011 | 0.0043 ±<br>0.0012 | 0.674        | 0.005 ± 0.001      | 0.006 ± 0.001      | 0.248        |
| Aromatic AA                            | 206 ± 40           | 206 ± 32           | 0.966        | 222 ± 40           | 217 ± 41           | 0.568        |
| BCAA                                   | 423 ± 102          | 462 ± 93           | 0.089        | 495 ± 93           | 492 ± 81           | 0.876        |
| Calc. SDMA/Arg                         | 0.006 ±<br>0.002   | 0.006 ±<br>0.002   | 0.263        | 0.0019 ±<br>0.0018 | 0.0018 ±<br>0.0015 | 0.872        |
| Cit/Arg                                | 0.289 ± 0.093      | 0.281 ± 0.098      | 0.494        | 0.220 ± 0.058      | 0.273 ± 0.068      | <b>0.001</b> |
| Cit/Orn                                | 0.443 ± 0.155      | 0.434 ± 0.142      | 0.795        | 0.355 ± 0.121      | 0.380 ± 0.082      | 0.278        |
| Essential AA                           | 1001 ± 166         | 1022 ± 131         | 0.531        | 1049 ± 149         | 1052 ± 145         | 0.928        |
| Fischer ratio                          | 2.063 ± 0.388      | 2.249 ± 0.381      | <b>0.042</b> | 2.263 ± 0.391      | 2.308 ± 0.366      | 0.804        |
| Glucogenic AA                          | 905 ± 105          | 857 ± 139          | 0.115        | 725 ± 113          | 784 ± 139          | 0.062        |
| Kyn/Trp                                | 0.047 ± 0.012      | 0.052 ± 0.013      | 0.117        | 0.065 ± 0.016      | 0.061 ± 0.015      | 0.249        |
| MetSO/Met                              | 0.128 ± 0.191      | 0.104 ± 0.155      | 0.418        | 0.128 ± 0.197      | 0.073 ± 0.144      | <b>0.007</b> |
| Non-essential AA                       | 2053 ± 182         | 1992 ± 247         | 0.247        | 1958 ± 252         | 2052 ± 275         | 0.141        |
| Orn/Arg                                | 0.704 ± 0.285      | 0.681 ± 0.220      | 0.916        | 0.648 ± 0.151      | 0.737 ± 0.199      | 0.055        |
| Putrescine/Orn                         | 0.0015 ±<br>0.0010 | 0.0015 ±<br>0.0009 | 0.528        | 0.0022 ±<br>0.0007 | 0.0019 ±<br>0.0008 | 0.058        |

|                                 |               |               |                  |                 |                 |              |
|---------------------------------|---------------|---------------|------------------|-----------------|-----------------|--------------|
| Ser/Trp                         | 0.011 ± 0.008 | 0.014 ± 0.009 | 0.101            | 0.0112 ± 0.0055 | 0.0116 ± 0.0073 | 0.940        |
| Spermidine/Putrescine           | 1.28 ± 0.80   | 1.76 ± 1.59   | 0.258            | 1.07 ± 0.28     | 1.27 ± 0.37     | <b>0.023</b> |
| Spermine/Spermidine             | 1.32 ± 0.36   | 1.24 ± 0.41   | 0.296            | 1.11 ± 0.87     | 0.95 ± 0.74     | 0.376        |
| Total AA                        | 3181 ± 338    | 3139 ± 341    | 0.596            | 3116 ± 381      | 3227 ± 411      | 0.247        |
| Total DMA/Arg                   | 0.010 ± 0.003 | 0.011 ± 0.003 | 0.248            | 0.007 ± 0.002   | 0.007 ± 0.002   | 0.286        |
| Tyr/Phe                         | 0.943 ± 0.155 | 0.975 ± 0.200 | 0.474            | 0.991 ± 0.192   | 0.928 ± 0.191   | 0.170        |
| <b>Lipids</b>                   |               |               |                  |                 |                 |              |
| MUFA PC                         | 263 ± 50      | 266 ± 62      | 0.983            | 248 ± 58        | 260 ± 55        | 0.370        |
| MUFA PC/SFA PC                  | 8.50 ± 1.14   | 9.37 ± 1.36   | <b>0.005</b>     | 9.17 ± 1.80     | 8.82 ± 0.92     | 0.755        |
| PUFA PC                         | 1304 ± 202    | 1213 ± 200    | 0.059            | 1175 ± 206      | 1284 ± 207      | <b>0.028</b> |
| PUFA PC/MUFA PC                 | 5.04 ± 0.79   | 4.64 ± 0.56   | <b>0.011</b>     | 4.84 ± 0.71     | 5.01 ± 0.50     | 0.230        |
| PUFA PC/SFA PC                  | 42.60 ± 7.00  | 43.15 ± 6.08  | 0.720            | 43.95 ± 7.82    | 44.01 ± 4.89    | 0.970        |
| SFA PC                          | 31 ± 7        | 29 ± 6        | 0.091            | 27.9 ± 8.8      | 29.7 ± 6.5      | 0.328        |
| Total lysoPC                    | 271 ± 46      | 249 ± 67      | 0.117            | 246 ± 66        | 254 ± 62        | 0.564        |
| Total lysoPC/total PC           | 0.17 ± 0.03   | 0.17 ± 0.04   | 0.333            | 0.17 ± 0.04     | 0.16 ± 0.03     | 0.333        |
| Total PC                        | 1601 ± 244    | 1511 ± 256    | 0.134            | 1453 ± 260      | 1576 ± 263      | 0.051        |
| Total PC aa                     | 1430 ± 219    | 1360 ± 236    | 0.201            | 1300 ± 240      | 1415 ± 245      | 0.051        |
| Total PC ae                     | 171 ± 36      | 151 ± 31      | <b>0.012</b>     | 153 ± 35        | 161 ± 29        | 0.252        |
| Total (PC+SM)                   | 2243 ± 315    | 2113 ± 329    | 0.091            | 2007 ± 346      | 2179 ± 333      | <b>0.036</b> |
| Total SM                        | 371 ± 55      | 353 ± 58      | 0.173            | 308 ± 61        | 348 ± 49        | <b>0.003</b> |
| Total SM (non-OH)               | 317 ± 46      | 307 ± 47      | 0.405            | 268 ± 53        | 301 ± 42        | <b>0.004</b> |
| Total SM (OH)                   | 54.9 ± 10.4   | 45.6 ± 13.0   | <b>&lt;0.001</b> | 40.08 ± 10.05   | 47.17 ± 9.52    | <b>0.003</b> |
| Total SM (OH)/total SM (non-OH) | 0.17 ± 0.02   | 0.15 ± 0.03   | <b>&lt;0.001</b> | 0.150 ± 0.025   | 0.157 ± 0.023   | 0.232        |
| Total SM/total PC               | 0.23 ± 0.03   | 0.24 ± 0.04   | 0.607            | 0.213 ± 0.029   | 0.224 ± 0.029   | 0.138        |
| Total SM/total PL pool          | 0.17 ± 0.01   | 0.17 ± 0.02   | 0.526            | 0.154 ± 0.017   | 0.161 ± 0.019   | 0.085        |

AA, amino acid; AC, acylcarnitine; AC-DC, dicarboxyacylcarnitine; AC-OH, hydroxylated acylcarnitine; Arg, arginine; BCAA, branched chain amino acid; Cit, citrulline; DMA, dimethylarginine; Kyn, kynurenine; lysoPC, monoacyl-glycerophosphocholine; Met, methionine; MetSO, methionine sulfoxide; MUFA, mono-unsaturated fatty acid; Orn, ornithine; PC aa, diacyl-glycerophosphocholine; PC ae, alkyl-acyl-glycerophosphocholine; Phe, phenylalanine; PL, phospholipid; PUFA, polyunsaturated fatty acid; SFA, saturated fatty acid; Ser, serine; SM, sphingomyelin; Trp, tryptophan; Tyr, tyrosine; data are expressed in  $\mu\text{M}$  as means  $\pm$  standard deviation; P-values are assessed by ANOVA (Benjamini-Hochberg or Tamhane post hoc analysis) or Kruskal-Wallis test; P-values  $<0.05$  were considered to indicate statistical significance and are marked in bold; metabolites are sorted in alphabetical order.

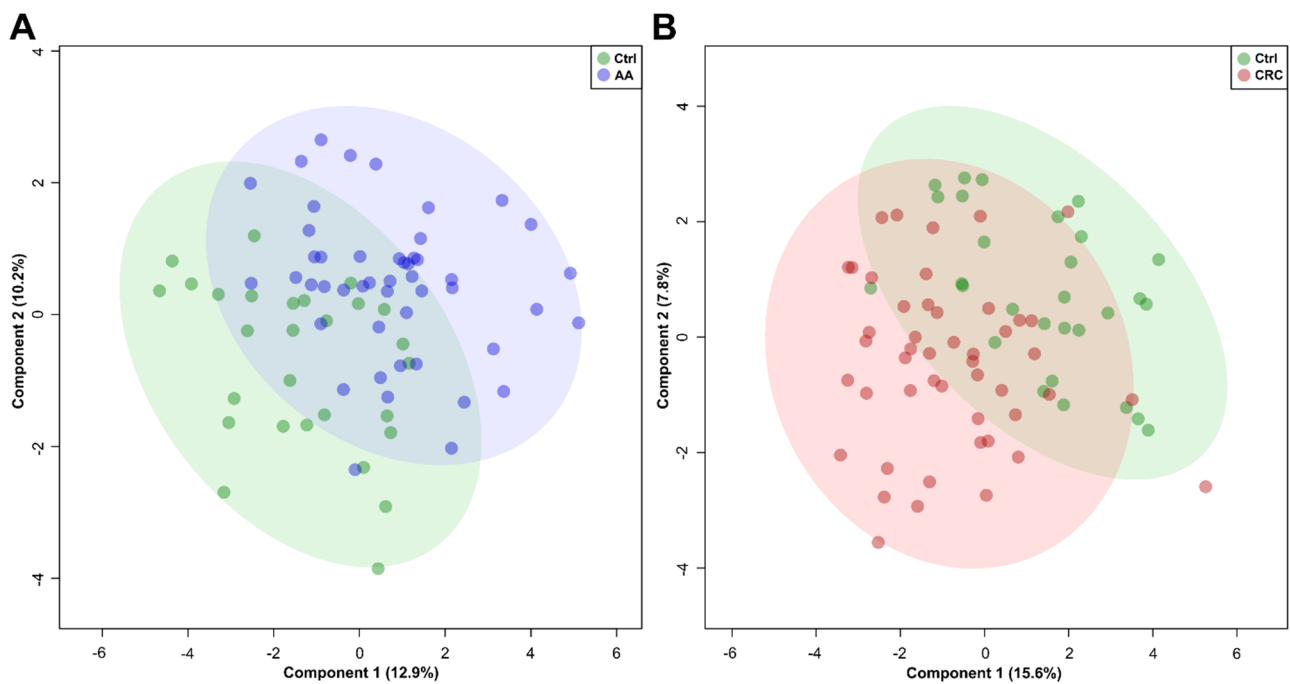

**Figure S1.** Sparse partial least discriminant analysis (sPLS-DA) of the two validation cohorts. (A) validation AA; (B) validation CRC; circles indicate 95% CI; adapted from MetaboAnalyst 4.0.

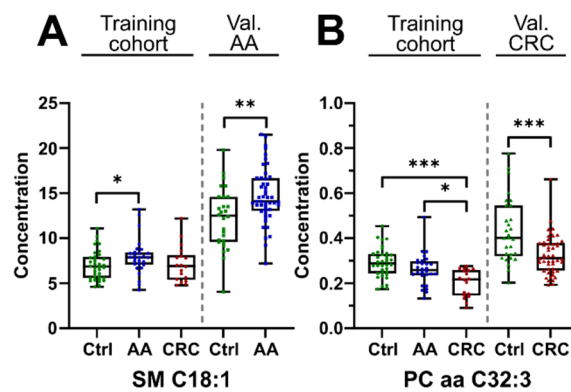

**Figure S2.** Selected validated metabolites of the training cohort and the validation cohorts. (A) SM C18:1 as one validated metabolite of the training cohort and validation AA; (B) PC aa C32:3 as one validated metabolite of the training cohort and validation CRC; data are expressed in  $\mu\text{M}$ ; \* indicates P-values < 0.05, \*\* P-values < 0.01, \*\*\* P-values < 0.001.
